# Supplementary material for: Neutrophil Elastase and Proteinase 3 Cleavage Sites Are Adjacent to the Polybasic Sequence within the Proteolytic Sensitive Activation Loop of the SARS-CoV-2 Spike Protein
Source: PubMed Central journal article supplement — ACS Omega. 2021 Mar 5;6(10):7181–5. doi: 10.1021/acsomega.1c00363 (PMC7970549; doi:10.1021/acsomega.1c00363), 2021-03-05
Supplement: ao1c00363_si_001.pdf [file ao1c00363_si_001.pdf]

## Supporting Information

### Neutrophil elastase and proteinase 3 cleavage sites are adjacent of the polybasic sequence within the proteolytic sensitive activation loop of the SARS-CoV-2 spike protein

Zhadyra Mustafa<sup>1</sup>, Anuar Zhanapiya<sup>1</sup>, Hubert Kalbacher<sup>2</sup>, and Timo Burster<sup>1\*</sup>

<sup>1</sup>Department of Biology, School of Sciences and Humanities, Nazarbayev University, Kabanbay Batyr Ave., 53, Nur-Sultan, 010000, Kazakhstan Republic

<sup>2</sup>Eberhard Karls University Tübingen, Faculty of Medicine, Institute of Clinical Anatomy and Cell Analysis, Österbergstraße 3, 72074 Tübingen, Germany

\*Corresponding author

#### S1: Inhibition of NE by Camostat

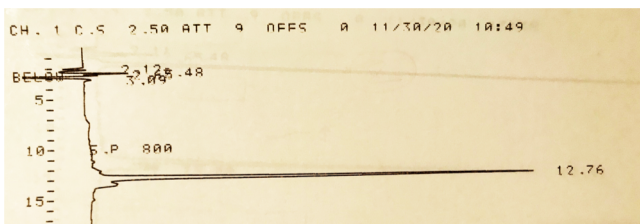

1. SARS-CoV-2

**Figure S1:** Inhibition of NE by Camostat.

SARS-CoV-2 peptide was preincubated with different concentrations of Camostat. Then NE was added for 2h at 37°C. The digestion pattern was resolved by HPLC.

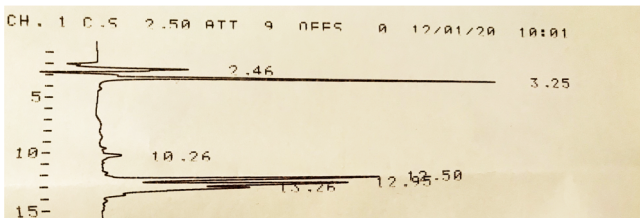

2. SARS2+NE

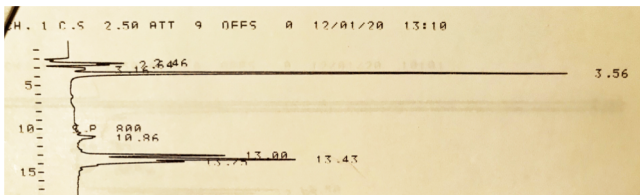

3. SARS2+NE+Camostat 0.1 μM

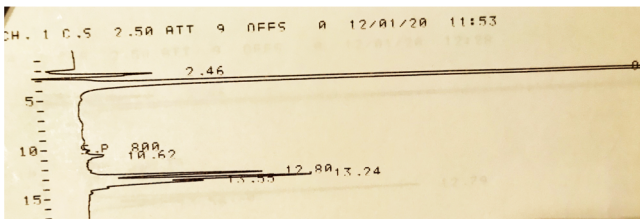

4. SARS2+NE+Camostat 1 μM

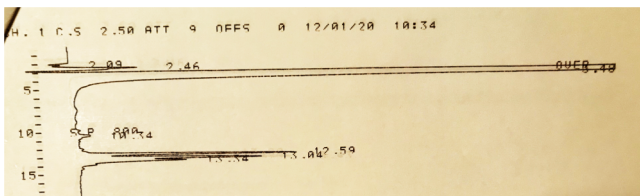

5. SARS2+NE+Camostat 10 μM

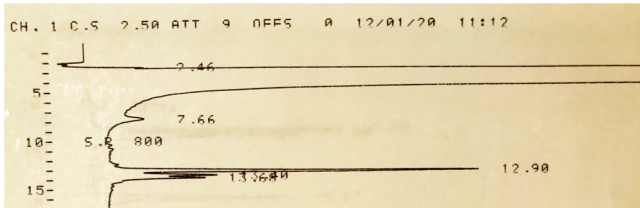

6. SARS2+NE+Camostat 100 μM
